# Supplementary material for: Smoking and Cutaneous Melanoma: Findings from the QSkin Sun and Health Cohort Study
Source: Oxford University Press journal article supplement (doi:10.1158/1055-9965.epi-17-1056), 2018-05-22
Supplement: 10559965epi171056-sup-192455_3_supp_4740928_p8dyrg.docx [file 10559965epi171056-sup-192455_3_supp_4740928_p8dyrg.docx]

**
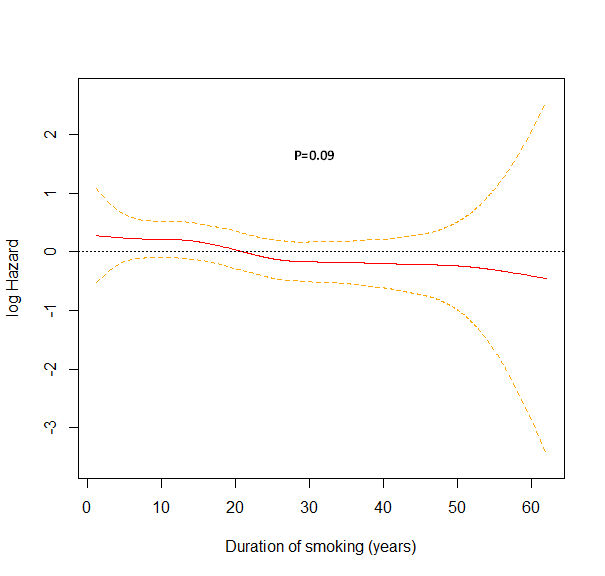
 Figure S1**

Figure S1. Relation of duration of smoking and its dose-response patterns with risk of melanoma. The solid line represents log hazard, and the dashed line represents its 95% confidence Intervals.

**Figure S2**

Figure S2. Relation of smoking intensity and its dose-response patterns with risk of melanoma. The solid line represents log hazard, and the dashed line represents its 95% confidence Intervals.
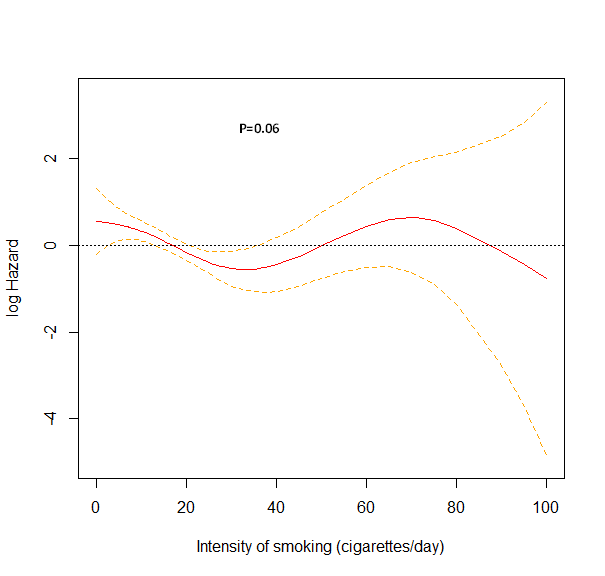


**Figure S3**


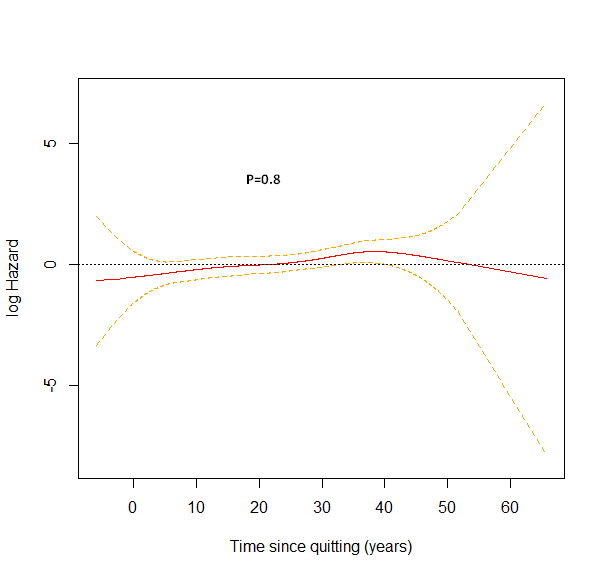


Figure S3. Relation of time since quitting smoking and its dose-response patterns with risk of melanoma. The solid line represents the log hazard, and the dashed line represents its 95% confidence Intervals.
